# Supplementary material for: Lack of precision in the reporting of sex and gender in cancer clinical trials with a PRO endpoint: a systematic review
Source: Research Square preprint supplement (doi:10.21203/rs.3.rs-7044860/v1), 2025-07-15
Supplement: Supplementary file 1 [file 04278c1c0ec4703d0c1ca162.docx]

**APPENDIX**

**Search strategy (exemplary for bladder cancer)**

(("quality of life"[All Fields] OR "health related quality of life"[All Fields] OR "health status"[All Fields] OR "health outcomes"[All Fields] OR "patient outcomes"[All Fields] OR "depression"[All Fields] OR "anxiety"[All Fields] OR "emotional"[All Fields] OR "social"[All Fields] OR "psychosocial"[All Fields] OR "psychological"[All Fields] OR "distress"[All Fields] OR "social functioning"[All Fields] OR "social wellbeing"[All Fields] OR "patient reported symptom"[All Fields] OR "patient reported outcomes"[All Fields] OR ("pain"[MeSH Terms] OR "pain"[All Fields]) OR ("fatiguability"[All Fields] OR "fatiguable"[All Fields] OR "fatigue"[MeSH Terms] OR "fatigue"[All Fields] OR "fatigued"[All Fields] OR "fatigues"[All Fields] OR "fatiguing"[All Fields] OR "fatigueability"[All Fields]) OR "patient reported outcome"[All Fields] OR "PRO"[All Fields] OR "PROs"[All Fields] OR "HRQL"[All Fields] OR "QOL"[All Fields] OR "HRQOL"[All Fields] OR "symptom distress"[All Fields] OR "symptom burden"[All Fields] OR "symptom assessment"[All Fields] OR "functional status"[All Fields] OR ("sexual behavior"[MeSH Terms] OR ("sexual"[All Fields] AND "behavior"[All Fields]) OR "sexual behavior"[All Fields] OR "sexual"[All Fields] OR "sexually"[All Fields] OR "sexualities"[All Fields] OR "sexuality"[MeSH Terms] OR "sexuality"[All Fields] OR "sexualization"[All Fields] OR "sexualize"[All Fields] OR "sexualized"[All Fields] OR "sexualizing"[All Fields] OR "sexuals"[All Fields]) OR ("functional"[All Fields] OR "functional s"[All Fields] OR "functionalities"[All Fields] OR "functionality"[All Fields] OR "functionalization"[All Fields] OR "functionalizations"[All Fields] OR "functionalize"[All Fields] OR "functionalized"[All Fields] OR "functionalizes"[All Fields] OR "functionalizing"[All Fields] OR "functionally"[All Fields] OR "functionals"[All Fields] OR "functioned"[All Fields] OR "functioning"[All Fields] OR "functionings"[All Fields] OR "functions"[All Fields] OR "physiology"[MeSH Subheading] OR "physiology"[All Fields] OR "function"[All Fields] OR "physiology"[MeSHTerms])) AND ("bladder s"[All Fields] OR "urinary bladder"[MeSH Terms] OR ("urinary"[All Fields] AND "bladder"[All Fields]) OR "urinary bladder"[All Fields] OR "bladder"[All Fields] OR "bladders"[All Fields]) AND ("cancer s"[All Fields] OR "cancerated"[All Fields] OR "canceration"[All Fields] OR "cancerization"[All Fields] OR "cancerized"[All Fields] OR "cancerous"[All Fields] OR "neoplasms"[MeSH Terms] OR "neoplasms"[All Fields] OR "cancer"[All Fields] OR "cancers"[All Fields] OR ("cysts"[MeSH Terms] OR "cysts"[All Fields] OR "cyst"[All Fields] OR "neurofibroma"[MeSHTerms] OR "neurofibroma"[All Fields] OR "neurofibromas"[All Fields] OR "tumor s"[All Fields] OR "tumoral"[All Fields] OR "tumorous"[All Fields] OR "tumour"[All Fields] OR "neoplasms"[MeSH Terms] OR "neoplasms"[All Fields] OR "tumor"[All Fields] OR "tumour s"[All Fields] OR "tumoural"[All Fields] OR "tumourous"[All Fields] OR "tumours"[All Fields] OR "tumors"[All Fields]) OR ("neoplasm s"[All Fields] OR "neoplasms"[MeSH Terms] OR "neoplasms"[All Fields] OR "neoplasm"[All Fields])) AND 2019/02/01:2022/02/10 [Date - Publication]) AND (clinicaltrial[Filter])

Supplementary Table 1 SAGER guidelines checklist items and reviewer instructions

| Section/topic | Item number | Checklist item | Instruction for reviewers extracting the data |
| --- | --- | --- | --- |
| **General** |  |  |  |
|  | 1 | The terms sex/gender used appropriately | considered appropriately, when the term (sex or gender) was consistently throughout the publication with the corresponding categories (dichotomized categories presented here exemplarily illustrated), i.e. for sex assigned at birth: female, male and for gender: women, men |
| **Title** |  |  |  |
|  | 2 | Title specifies the sex/gender of participants if only one included | n/a if not only one sex or gender was included |
| **Abstract** |  |  |  |
|  | 3a | Abstract specifies the sex/gender of participants if only one included | n/a if not only one sex or gender was included |
|  | 3b | Study population described with sex/gender breakdown |  |
| **Introduction** |  |  |  |
|  | 4a | If relevant, previous studies that show presence or lack of sex/gender differences or similarities cited |  |
|  | 4b | Mention of whether sex/gender might be an important variant and if differences might be expected |  |
|  | 4c | The demographics of the study population with regard to sex/gender (e.g., disease prevalence among male/female study participants) are outlined) |  |
| **Methods** |  |  |  |
|  | 5a | Method of definition of sex/gender (e.g., self-report, genetic testing) |  |
|  | 5b | Description of how sex/gender was considered in the design, whether authors ensured adequate respresentation of male and female study participants, or explanation if not considered. Justification of other sex/gender-specific interventions of study designs (e.g., mandating contraception for women). Explicit reporting of the scientific rationale for contraception requirements and exclusions for pregnancy and lactation should be required | if one of the aspects of the item is covered, choose "yes" |
| **Results** |  |  |  |
|  | 6a | Study population description with complete gender/sex breakdown for all categories considered |  |
|  | 6b | Where appropriate, data presented disaggregated by sex/gender, and sex/gender differences and similarities described |  |
|  | 6c | Sex- and gender-based analyses reported regardless of outcome (in main paper if pre-specified; otherwise in appendix) |  |
|  | 6d | For clinical trials, adverse event data disaggregated by sex/gender (in main paper if pre-specified; otherwise in appendix) |  |
|  | 6f | For epidemiological studies, the effects of other exposures on health problems examined for all genders and analysed critically from a gender perspective | No epidemiological studies were included in this review. Therefore, this item was rated "n/a" for all references. |
|  | 6g | Table 1 included separate rows for male sex/gender, female sex/gender and other categories if collected |  |
| **Discussion** |  |  |  |
|  | 7a | Potential implications of sex/gender on the study results and analyses, including the extent to which the finding can be generalized to all sexes/genders in the population |  |
|  | 7b | If a sex/gender analysis not done, a rationale is given and implications of the lack of such analysis on the interpretation of the results are discussed |  |

Supplementary Table 2 SAGER checklist results individual study level (review question a.)

| **Ref** | **Authors (Year)** | **1** | **2** | **3a** | **3b** | **4a** | **4b** | **4c** | **5a** | **5b** | **6a** | **6b** | **6c** | **6d** | **6e** | **6f** | **6g** | **7a** | **7b** |
| --- | --- | --- | --- | --- | --- | --- | --- | --- | --- | --- | --- | --- | --- | --- | --- | --- | --- | --- | --- |
| [32] | Wang et al (2019) | no | n/a | n/a | no | no | no | no | no | no | no | no | no | no | no | n/a | yes | no | no |
| [33] | Yoo et al (2019) | yes | n/a | n/a | no | no | no | no | no | yes | no | no | n/a | no | no | n/a | no | no | no |
| [34] | Marti et al (2019) | no | n/a | n/a | no | no | no | no | no | yes | no | no | no | no | no | n/a | yes | no | no |
| [35] | Kelly et al (2019) | no | n/a | n/a | no | no | no | no | no | yes | no | no | no | no | no | n/a | no | no | no |
| [36] | van Diessen et al (2019) | no | n/a | n/a | no | no | no | no | no | no | no | no | no | no | no | n/a | no | no | no |
| [37] | Fujita et al (2019) | no | n/a | n/a | no | no | no | no | no | yes | no | yes | yes | no | no | n/a | yes | no | n/a |
| [38] | Ibáñez et al (2019) | yes | n/a | n/a | no | no | no | no | no | no | no | no | no | no | no | n/a | yes | no | no |
| [39] | Shitara et al (2019) | no | n/a | n/a | no | no | no | no | no | no | no | no | no | no | no | n/a | no | no | no |
| [40] | Suwa et al (2019) | no | n/a | n/a | no | no | no | no | no | no | no | no | no | no | no | n/a | yes | no | no |
| [41] | Sun et al (2019) | no | n/a | n/a | no | no | no | no | no | yes | yes | yes | yes | no | yes | n/a | unclear | no | n/a |
| [42] | Reck et al (2019) | yes | n/a | n/a | no | no | no | no | no | no | no | yes | yes | no | no | n/a | no | no | n/a |
| [43] | Pujol et al (2019) | no | n/a | n/a | no | no | no | no | no | yes | no | yes | yes | no | no | n/a | no | no | n/a |
| [44] | Si et al (2019) | no | n/a | n/a | no | no | no | no | no | no | no | no | no | no | no | n/a | no | no | no |
| [45] | Keane et al (2019) | yes | n/a | n/a | no | yes | no | no | no | yes | no | no | yes | no | no | n/a | no | yes | n/a |
| [46] | Barlesi et al (2019) | no | n/a | n/a | no | no | no | no | no | no | no | yes | yes | no | no | n/a | no | no | n/a |
| [47] | Wang et al (2019) | no | n/a | n/a | no | no | no | yes | no | no | no | no | no | no | no | n/a | no | yes | no |
| [48] | Lacas et al (2019) | yes | n/a | n/a | no | no | no | no | no | yes | no | yes | yes | no | no | n/a | yes | no | n/a |
| [49] | Ball et al (2019) | yes | n/a | n/a | no | no | no | no | no | yes | no | no | no | no | no | n/a | no | no | no |
| [50] | Schuler et al (2019) | no | n/a | n/a | no | yes | no | no | no | no | no | yes | no | no | no | n/a | no | no | n/a |
| [51] | Fennell et al (2019) | yes | n/a | n/a | no | no | yes | no | no | no | no | no | no | no | no | n/a | no | no | n/a |
| [52] | Watanabe et al (2019) | yes | n/a | n/a | no | no | no | no | yes | no | no | no | no | no | no | n/a | yes | no | no |
| [53] | Sugawara et al (2019) | yes | n/a | n/a | no | no | no | no | no | no | no | yes | yes | no | no | n/a | yes | no | n/a |
| [54] | Bendixen et al (2019) | yes | n/a | n/a | no | no | no | no | no | no | no | no | yes | no | no | n/a | yes | no | n/a |
| [55] | Winther et al (2019) | no | n/a | n/a | no | no | no | unclear | no | yes | no | yes | yes | no | no | n/a | yes | no | n/a |
| [56] | Diefenhardt et al (2019) | no | n/a | n/a | no | yes | no | no | no | yes | no | yes | yes | no | no | n/a | yes | yes | n/a |
| [57] | van der Valk et al (2019) | no | n/a | n/a | no | no | no | no | no | no | no | no | no | no | no | n/a | yes | no | no |
| [58] | Zhao et al (2019) | yes | n/a | n/a | no | no | no | no | no | yes | no | no | no | no | no | n/a | yes | no | no |
| [59] | Parc et al (2019) | no | n/a | n/a | no | no | no | no | no | yes | no | yes | yes | no | yes | n/a | no | no | n/a |
| [60] | Aghayan et al (2019) | no | n/a | n/a | no | no | no | no | no | yes | no | yes | yes | no | no | n/a | yes | no | n/a |
| [61] | Keeler et al (2019) | no | n/a | n/a | no | no | no | no | no | yes | no | no | no | no | no | n/a | no | no | no |
| [62] | Saito et al (2019) | no | n/a | n/a | no | no | no | no | no | yes | no | yes | yes | no | no | n/a | yes | no | n/a |
| [63] | Eng et al (2019) | no | n/a | n/a | no | no | no | no | no | no | no | no | no | no | no | n/a | yes | no | no |
| [64] | Pérol et al (2019) | yes | n/a | n/a | no | no | no | no | no | yes | no | yes | no | no | no | n/a | no | no | n/a |
| [65] | Kelly et al (2019) | yes | n/a | n/a | no | no | no | no | no | no | no | no | no | no | no | n/a | yes | no | no |
| [66] | Brown et al (2019) | no | n/a | n/a | no | no | no | no | no | no | no | no | no | no | no | n/a | no | no | no |
| [67] | Mari et al (2019) | yes | n/a | n/a | no | yes | no | no | no | yes | no | no | no | no | unclear | n/a | yes | yes | n/a |
| [68] | Platania et al (2019) | yes | n/a | n/a | no | no | no | no | no | no | no | yes | yes | no | no | n/a | no | no | n/a |
| [69] | Toritani et al (2019) | no | n/a | n/a | no | no | no | no | no | yes | no | no | no | no | no | n/a | no | no | no |
| [70] | Govindan et al (2019) | yes | n/a | n/a | no | no | no | no | no | yes | no | yes | yes | no | no | n/a | yes | no | n/a |
| [71] | Eberst et al (2019) | no | n/a | n/a | no | yes | yes | no | no | yes | no | yes | yes | no | no | n/a | yes | no | n/a |
| [72] | Reck et al (2019) | yes | n/a | n/a | no | no | no | no | no | yes | no | yes | yes | no | no | n/a | yes | no | n/a |
| [73] | Morabito et al (2019) | no | n/a | n/a | no | no | no | no | no | yes | no | yes | yes | no | no | n/a | yes | no | n/a |
| [74] | Wang et al (2019) | no | n/a | n/a | no | no | no | no | no | yes | no | no | no | no | no | n/a | yes | no | no |
| [75] | Bekaii-Saab et al (2019) | yes | n/a | n/a | no | no | no | no | no | no | no | no | no | no | no | n/a | yes | no | no |
| [76] | Lenderking et al (2019) | no | n/a | n/a | no | no | no | no | no | no | no | no | no | no | no | n/a | yes | no | n/a |
| [77] | Noronha et al (2020) | yes | n/a | n/a | no | no | yes | no | no | yes | no | yes | yes | no | no | n/a | no | no | n/a |
| [78] | Singh et al (2019) | no | n/a | n/a | no | no | no | no | no | no | no | no | no | no | no | n/a | yes | no | no |
| [79] | Cui et al (2019) | no | n/a | n/a | no | no | no | no | no | no | no | no | no | no | no | n/a | yes | no | no |
| [80] | Lim et al (2019) | no | n/a | n/a | no | no | no | no | no | yes | no | no | no | no | no | n/a | no | no | no |
| [81] | Kim et al (2020) | yes | yes | yes | n/a | yes | n/a | no | no | yes | n/a | n/a | n/a | n/a | n/a | n/a | n/a | yes | n/a |
| [82] | Pi et al (2019) | no | n/a | n/a | no | no | no | no | no | no | no | no | no | no | no | n/a | yes | no | no |
| [83] | Kurk et al (2019) | yes | n/a | n/a | no | no | no | no | no | yes | no | yes | no | no | no | n/a | yes | no | n/a |
| [84] | Song et al (2019) | n/a | n/a | n/a | no | no | no | no | n/a | no | no | no | no | no | no | n/a | n/a | no | no |
| [85] | Jiang et al (2019) | no | n/a | n/a | no | no | no | no | no | no | no | no | yes | no | no | n/a | no | no | n/a |
| [86] | Hui et al (2019) | yes | n/a | n/a | no | yes | yes | no | no | yes | no | yes | yes | no | no | n/a | yes | no | n/a |
| [87] | Brown et al (2020) | yes | n/a | n/a | no | no | no | no | no | yes | no | yes | yes | no | no | n/a | unclear | no | n/a |
| [88] | Stamatis et al (2019) | yes | n/a | n/a | no | no | no | no | no | yes | no | no | no | no | no | n/a | yes | no | no |
| [89] | Lenz et al (2019) | no | n/a | n/a | no | no | no | no | no | yes | no | yes | yes | no | no | n/a | no | no | n/a |
| [90] | Li et al (2019) | no | n/a | n/a | no | no | no | no | no | yes | no | no | no | no | no | n/a | no | no | no |
| [91] | Holmsten et al (2020) | yes | n/a | n/a | no | no | no | no | no | no | no | no | no | no | no | n/a | yes | no | no |
| [92] | Pérol et al (2019) | yes | n/a | n/a | no | no | no | no | no | no | no | yes | yes | no | no | n/a | yes | no | n/a |
| [93] | Hosomi et al (2020) | yes | n/a | n/a | no | no | no | no | no | yes | no | yes | yes | no | no | n/a | yes | no | n/a |
| [94] | Witlox et al (2020) | no | n/a | n/a | no | no | no | no | no | yes | no | no | yes | no | no | n/a | no | no | n/a |
| [95] | Pietrantonio et al (2020) | no | n/a | n/a | no | no | no | no | no | yes | no | no | no | no | no | n/a | yes | no | no |
| [96] | Mazieres et al (2020) | yes | n/a | n/a | no | no | no | no | no | no | no | yes | yes | no | no | n/a | no | no | n/a |
| [97] | Viti et al (2020) | no | n/a | n/a | no | no | no | no | no | yes | no | no | no | no | no | n/a | no | no | no |
| [98] | Treasure et al (2019) | yes | n/a | n/a | no | no | no | no | no | yes | no | no | no | no | no | n/a | yes | no | no |
| [99] | Wolstenholme et al (2020) | no | n/a | n/a | no | no | no | no | no | yes | no | yes | yes | no | no | n/a | yes | no | n/a |
| [100] | Huddart et al (2020) | yes | n/a | n/a | no | no | no | no | no | yes | no | no | no | no | unclear | n/a | no | no | no |
| [101] | Chakravarthy et al (2020) | no | n/a | n/a | no | no | no | no | no | no | no | no | no | no | no | n/a | yes | no | no |
| [102] | Lin et al (2019) | no | n/a | n/a | no | no | no | no | no | no | no | no | no | no | no | n/a | yes | no | no |
| [103] | Deng et al (2019) | yes | n/a | n/a | no | no | no | no | no | no | no | no | no | no | no | n/a | no | no | no |
| [104] | Ba et al (2019) | n/a | n/a | n/a | no | no | no | no | no | no | no | no | no | no | no | n/a | n/a | no | no |
| [105] | Xu et al (2020) | yes | n/a | n/a | no | no | no | no | no | no | no | no | no | no | no | n/a | no | no | no |
| [106] | Zhang et al (2020) | no | n/a | n/a | no | no | no | no | no | yes | no | no | no | no | no | n/a | yes | no | no |
| [107] | Noronha et al (2020) | yes | n/a | n/a | no | no | no | no | no | no | no | no | no | no | no | n/a | yes | no | no |
| [108] | Mansfield et al (2020) | yes | n/a | n/a | no | no | no | no | no | yes | no | yes | yes | no | no | n/a | no | no | n/a |
| [109] | Zhang et al (2021) | no | n/a | n/a | no | no | no | no | no | no | no | no | no | no | no | n/a | no | no | no |
| [110] | Huang et al (2020) | unclear | n/a | n/a | no | no | no | no | no | no | no | no | no | no | no | n/a | no | no | no |
| [111] | Zutshi et al (2020) | no | n/a | n/a | yes | no | no | no | no | no | no | yes | yes | no | no | n/a | no | no | n/a |
| [112] | Garassino et al (2020) | yes | n/a | n/a | no | no | no | no | no | no | no | yes | yes | no | no | n/a | no | no | n/a |
| [113] | Liu et al (2020) | no | n/a | n/a | no | no | no | no | no | no | no | no | no | no | no | n/a | no | no | no |
| [114] | Mostafid et al (2020) | no | n/a | n/a | no | no | no | no | no | no | no | no | no | no | no | n/a | yes | no | no |
| [115] | Shi et al (2020) | no | n/a | n/a | no | no | no | yes | no | no | no | no | no | no | no | n/a | no | no | no |
| [116] | Lee et al (2021) | yes | n/a | n/a | no | no | no | no | no | no | no | no | no | no | no | n/a | no | no | no |
| [117] | Dutau et al (2020) | unclear | n/a | n/a | no | no | no | no | no | no | no | no | no | no | no | n/a | n/a | no | no |
| [118] | Miao et al (2020) | no | n/a | n/a | no | no | no | no | no | no | no | no | no | no | no | n/a | no | no | no |
| [119] | Zhu et al (2020) | yes | n/a | n/a | no | no | no | no | no | yes | no | no | no | no | no | n/a | no | no | no |
| [120] | Becerra et al (2020) | no | n/a | n/a | no | no | no | no | no | yes | no | no | no | no | no | n/a | yes | no | n/a |
| [121] | Park et al (2020) | yes | n/a | n/a | yes | no | no | unclear | no | yes | yes | yes | yes | yes | no | n/a | no | yes | n/a |
| [122] | Fiori et al (2020) | no | n/a | n/a | no | yes | no | no | no | yes | no | no | no | no | no | n/a | yes | no | n/a |
| [123] | Chen et al (2020) | no | n/a | n/a | no | no | no | no | no | no | no | yes | yes | no | no | n/a | yes | yes | n/a |
| [124] | Seligmann et al (2020) | yes | n/a | n/a | no | no | no | no | no | no | no | yes | yes | no | no | n/a | yes | yes | n/a |
| [125] | Zhou et al (2020) | unclear | n/a | n/a | no | no | no | no | no | no | no | no | yes | no | no | n/a | no | no | n/a |
| [126] | Weksler et al (2021) | no | n/a | n/a | no | no | no | no | no | no | no | no | no | no | no | n/a | yes | yes | unclear |
| [127] | Kurreck et al (2020) | yes | n/a | n/a | no | no | no | no | no | no | no | no | no | no | no | n/a | yes | no | no |
| [128] | Zhao et al (2020) | no | n/a | n/a | no | no | no | yes | no | yes | no | no | no | no | no | n/a | no | no | n/a |
| [129] | Reck et al (2020) | yes | n/a | n/a | no | no | no | no | no | yes | no | no | no | no | no | n/a | no | no | n/a |
| [130] | Tanaka et al (2020) | yes | n/a | n/a | no | no | no | no | no | yes | no | yes | yes | no | no | n/a | yes | no | no |
| [131] | Gootjes et al (2020) | no | n/a | n/a | no | no | no | no | no | yes | no | no | no | no | no | n/a | no | no | no |
| [132] | Van Cutsem et al (2020) | no | n/a | n/a | no | no | no | no | no | yes | no | yes | yes | no | no | n/a | no | no | n/a |
| [133] | Halvorsen et al (2020) | no | n/a | n/a | yes | no | no | no | no | yes | no | no | no | no | no | n/a | yes | no | n/a |
| [134] | Liu et al (2020) | no | n/a | n/a | no | no | no | yes | no | no | no | no | no | no | no | n/a | no | no | no |
| [135] | Lu et al (2020) | no | n/a | n/a | no | no | no | no | no | no | no | yes | yes | no | no | n/a | yes | no | no |
| [136] | Raimondi et al (2020) | no | n/a | n/a | yes | yes | yes | yes | no | yes | yes | yes | yes | yes | yes | n/a | yes | yes | n/a |
| [137] | Kashiwa & Matsushita (2020) | no | n/a | n/a | no | no | no | no | no | yes | no | yes | yes | no | no | n/a | yes | no | n/a |
| [138] | Kitamura et al (2020) | no | n/a | n/a | no | no | no | no | no | no | no | no | no | no | no | n/a | yes | no | no |
| [139] | Haruethaivijitchock et al (2020) | yes | n/a | n/a | no | no | no | no | no | no | no | no | no | no | no | n/a | yes | no | no |
| [140] | Samalin et al (2020) | no | n/a | n/a | no | no | no | no | no | no | no | no | no | no | no | n/a | no | no | no |
| [141] | Huang et al (2020) | yes | n/a | n/a | no | no | no | no | no | no | no | no | no | no | no | n/a | no | no | no |
| [142] | Yoh et al (2020) | no | n/a | n/a | no | no | no | no | no | yes | no | yes | yes | no | no | n/a | yes | no | n/a |
| [143] | Steffen McLouth et al (2020) | yes | n/a | n/a | no | no | yes | no | no | yes | no | yes | yes | no | no | n/a | yes | yes | n/a |
| [144] | Goldman et al (2020) | no | n/a | n/a | no | no | no | no | no | yes | no | yes | yes | no | no | n/a | yes | no | n/a |
| [145] | Kotaka et al (2020) | yes | n/a | n/a | no | no | no | no | no | no | no | no | no | no | no | n/a | yes | no | no |
| [146] | Planellas et al (2020) | no | n/a | n/a | no | no | yes | no | no | yes | no | no | yes | no | no | n/a | yes | no | n/a |
| [147] | Gavaruzzi et al (2020) | no | n/a | n/a | no | no | yes | no | no | yes | no | yes | yes | no | yes | n/a | yes | yes | n/a |
| [148] | Loree et al (2021) | no | n/a | n/a | no | no | no | no | no | no | no | no | no | no | no | n/a | yes | no | no |
| [149] | Spigel et al (2021) | yes | n/a | n/a | no | no | no | no | no | no | no | no | no | no | no | n/a | no | no | no |
| [150] | Zhu et al (2020) | yes | n/a | n/a | no | no | no | no | no | yes | no | no | no | no | no | n/a | yes | no | no |
| [151] | Hart et al (2021) | no | n/a | n/a | no | yes | no | no | no | no | no | no | no | no | no | n/a | yes | yes | no |
| [152] | Necchi et al (2020) | no | n/a | n/a | no | no | no | no | no | no | no | yes | yes | no | no | n/a | unclear | no | n/a |
| [153] | Paty et al (2021) | yes | n/a | n/a | no | no | no | no | no | yes | no | yes | yes | no | no | n/a | yes | yes | n/a |
| [154] | Kang et al (2020) | unclear | n/a | n/a | no | no | no | no | no | no | no | no | no | no | no | n/a | no | no | no |
| [155] | Zeng et al (2020) | no | n/a | n/a | no | no | no | no | no | yes | no | yes | yes | no | no | n/a | no | no | n/a |
| [156] | Sobrero et al (2021) | yes | n/a | n/a | no | no | no | no | no | no | no | no | no | no | no | n/a | yes | no | no |
| [157] | Shaw et al (2020) | no | n/a | n/a | no | no | no | no | no | yes | no | yes | yes | no | no | n/a | yes | no | n/a |
| [158] | Wei et al (2021) | n/a | yes | yes | n/a | no | n/a | n/a | no | no | n/a | n/a | n/a | n/a | n/a | n/a | n/a | n/a | n/a |
| [159] | Bahadoer et al (2021) | no | n/a | n/a | no | no | no | no | no | yes | no | no | no | no | no | n/a | yes | no | no |
| [160] | Bach et al (2021) | yes | n/a | n/a | no | no | no | no | no | no | no | yes | yes | no | yes | n/a | yes | no | no |
| [161] | Huddart et al (2021) | yes | n/a | n/a | no | no | no | no | no | no | no | no | no | no | no | n/a | yes | no | no |
| [162] | Zhang et al (2020) | no | n/a | n/a | no | no | no | no | no | no | no | no | no | no | no | n/a | yes | no | no |
| [163] | Catto et al (2021) | no | n/a | n/a | no | no | no | unclear | no | yes | no | no | no | no | no | n/a | yes | no | no |
| [164] | Hashem et al (2021) | unclear | no | yes | n/a | no | n/a | no | no | yes | n/a | n/a | n/a | n/a | n/a | n/a | n/a | yes | n/a |
| [165] | Wang et al (2021) | no | n/a | n/a | no | no | no | no | no | no | no | no | no | no | no | n/a | yes | no | no |
| [166] | Shang et al (2020) | yes | n/a | n/a | no | no | no | no | no | no | no | no | no | no | no | n/a | no | no | no |
| [167] | Elsabeeny et al (2021) | yes | n/a | n/a | no | no | no | no | no | no | no | no | no | no | no | n/a | yes | no | no |
| [168] | Tabernero et al (2021) | yes | n/a | n/a | no | no | no | no | no | no | no | yes | yes | no | no | n/a | yes | no | n/a |
| [169] | Cho et al (2021) | yes | n/a | n/a | no | no | no | no | no | no | no | no | no | no | no | n/a | no | no | no |
| [170] | Sezer et al (2021) | no | n/a | n/a | unclear | no | no | yes | no | no | no | yes | yes | no | no | n/a | yes | yes | n/a |
| [171] | Lai et al (2021) | yes | n/a | n/a | no | no | no | no | no | no | no | no | no | no | no | n/a | no | no | no |
| [172] | Camerini et al (2021) | no | n/a | n/a | no | no | no | yes | no | no | no | no | no | no | no | n/a | no | no | no |
| [173] | Arrieta et al (2021) | yes | n/a | n/a | no | no | no | no | no | yes | no | yes | yes | no | no | n/a | yes | no | n/a |
| [174] | Gao et al (2022) | yes | n/a | n/a | no | no | no | no | no | no | no | no | no | no | no | n/a | no | no | no |
| [175] | Garcia Campelo et al (2021) | yes | n/a | n/a | no | no | no | no | no | yes | no | yes | yes | no | no | n/a | no | no | n/a |
| [176] | Pehlivanoğlu et al (2021) | unclear | no | no | n/a | yes | yes | n/a | no | yes | n/a | n/a | n/a | n/a | n/a | n/a | n/a | yes | n/a |
| [177] | Moussa et al (2021) | n/a | no | yes | n/a | no | n/a | no | n/a | n/a | n/a | n/a | n/a | n/a | n/a | n/a | n/a | n/a | n/a |
| [178] | M Liang et al (2021) | unclear | n/a | n/a | no | no | no | no | no | no | no | no | no | no | no | n/a | no | no | no |
| [179] | Garon et al (2021) | yes | n/a | n/a | no | no | no | no | no | no | no | no | no | no | no | n/a | yes | no | no |
| [180] | Andre et al (2021) | no | n/a | n/a | no | no | no | no | no | yes | no | yes | yes | no | no | n/a | no | no | n/a |
| [181] | Johnson et al (2021) | unclear | n/a | n/a | no | no | no | no | no | no | no | no | no | no | no | n/a | no | no | no |
| [182] | Zhao et al (2021) | no | n/a | n/a | no | no | no | no | no | no | no | no | no | no | no | n/a | no | no | no |
| [183] | Egenvall et al (2021) | no | n/a | n/a | yes | no | no | no | no | yes | no | no | no | no | no | n/a | no | no | n/a |
| [184] | Chen et al (2021) | no | n/a | n/a | no | no | no | no | no | no | no | no | no | no | no | n/a | yes | no | no |
| [185] | Wang et al (2021) | no | n/a | n/a | no | no | no | no | no | no | no | no | no | no | no | n/a | no | no | no |
| [186] | Conroy et al (2021) | yes | n/a | n/a | no | no | no | no | no | yes | no | no | no | no | no | n/a | yes | no | n/a |
| [187] | Milone et al (2021) | yes | n/a | n/a | no | no | no | no | no | no | no | no | no | no | no | n/a | no | no | no |
| [188] | Falk et al (2021) | no | n/a | n/a | no | no | no | no | no | no | no | yes | yes | no | no | n/a | no | no | n/a |
| [189] | Ryoo et al (2021) | no | yes | yes | n/a | no | n/a | no | no | yes | n/a | n/a | n/a | n/a | n/a | n/a | n/a | yes | n/a |
| [190] | Sano et al (2021) | yes | n/a | n/a | no | no | no | no | no | yes | no | no | no | no | no | n/a | yes | no | no |
| [191] | Zhao et al (2021) | yes | n/a | n/a | no | no | no | no | no | yes | no | yes | yes | no | no | n/a | yes | no | n/a |
| [192] | Powles et al (2021) | yes | n/a | n/a | no | no | no | no | no | yes | no | no | no | no | no | n/a | yes | no | no |
| [193] | Bajorin et al (2021) | no | n/a | n/a | no | no | no | no | no | no | no | no | no | no | no | n/a | unclear | no | no |
| [194] | Chi et al (2021) | no | n/a | n/a | no | no | no | no | no | no | no | yes | yes | no | no | n/a | yes | no | no |
| [195] | Powles et al (2021) | unclear | n/a | n/a | no | no | no | no | no | no | no | no | no | no | no | n/a | no | no | no |
| [196] | Xu et al (2021) | yes | n/a | n/a | no | no | no | no | no | yes | no | yes | yes | no | no | n/a | no | no | n/a |
| [197] | Huh et al (2021) | no | n/a | n/a | no | no | yes | yes | no | yes | no | no | no | no | no | n/a | no | yes | no |
| [198] | He et al (2021) | yes | n/a | n/a | no | no | no | no | no | yes | no | yes | yes | no | no | n/a | yes | no | n/a |
| [199] | Denda et al (2021) | yes | n/a | n/a | no | no | no | no | no | no | no | no | no | no | no | n/a | yes | no | no |
| [200] | Avallone et al (2021) | no | n/a | n/a | no | no | no | no | no | no | no | no | no | no | no | n/a | yes | no | no |
| [201] | Elsner et al (2021) | no | n/a | n/a | no | no | no | no | no | no | no | no | yes | no | no | n/a | no | no | n/a |
| [202] | Hou et al (2021) | no | n/a | n/a | no | no | no | no | no | yes | no | yes | yes | no | no | n/a | no | yes | n/a |
| [203] | Rodríguez de Dios et al (2021) | yes | n/a | n/a | no | no | no | no | no | no | no | no | no | no | no | n/a | yes | no | no |
| [204] | Zhou et al (2021) | no | n/a | n/a | no | no | no | no | no | yes | no | yes | yes | no | no | n/a | yes | no | no |
| [205] | Zhang et al (2021) | yes | n/a | n/a | no | no | no | no | no | no | no | no | no | no | no | n/a | no | no | no |
| [206] | Planellas et al (2022) | no | n/a | n/a | no | no | no | no | no | yes | no | yes | yes | no | yes | n/a | yes | yes | n/a |
| [207] | Stahler et al (2021) | no | n/a | n/a | no | no | no | no | no | yes | no | yes | yes | no | no | n/a | yes | no | n/a |
| [208] | Adams et al (2021) | yes | n/a | n/a | no | no | no | no | no | no | no | no | no | no | no | n/a | yes | no | no |
| [209] | Zong et al (2021) | no | n/a | n/a | no | no | no | no | no | no | no | no | no | no | no | n/a | n/a | no | no |
| [210] | Zhao et al (2021) | no | n/a | n/a | no | no | no | no | no | no | no | no | no | no | no | n/a | yes | no | no |
| [211] | van der Kruijssen et al (2021) | unclear | n/a | n/a | no | yes | no | no | no | yes | no | yes | yes | no | no | n/a | yes | no | n/a |
| [212] | Zhou et al (2021) | no | n/a | n/a | no | no | no | no | no | no | no | no | no | no | no | n/a | yes | no | no |
| [213] | Wang et al (2021) | no | n/a | n/a | no | no | no | yes | no | yes | no | no | no | no | no | n/a | no | no | no |
| [214] | Zhang et al (2021) | unclear | n/a | n/a | no | no | no | no | no | no | no | no | no | no | no | n/a | n/a | no | no |
| [215] | Wang et al (2021) | no | n/a | n/a | no | no | no | yes | no | no | no | no | no | no | no | n/a | yes | no | no |
